# Supplementary material
Source: PubMed Central journal article supplement (PMC8087757)
Supplement: 12250_2021_375_MOESM2_ESM.pdf [file 12250_2021_375_MOESM2_ESM.pdf]

## Electronic Supplementary Material

### African Swine Fever Virus Protein E199L Promotes Cell Autophagy through the Interaction of PYCR2

Sheng Chen<sup>1,2,3</sup> • Xinheng Zhang<sup>1,2,3</sup> • Yu Nie<sup>1,2,3</sup> • Hongxin Li<sup>1,2,3</sup> • Weiguo Chen<sup>1,2,3</sup> • Wencheng Lin<sup>1,2,3</sup> • Feng Chen<sup>1,2,3</sup> • Qingmei Xie<sup>1,2,3</sup>✉

1. College of Animal Science, South China Agricultural University & Lingnan Guangdong Laboratory of Modern Agriculture & Guangdong Provincial Key Lab of Agro-Animal Genomics and Molecular Breeding, Guangzhou 510642, China

2. South China Collaborative Innovation Center for Poultry Disease Control and Product Safety, Guangzhou 510642, China

3. Key Laboratory of Animal Health Aquaculture and Environmental Control, Guangzhou 510642, China

Supporting information to DOI: 10.1007/s12250-021-00375-x

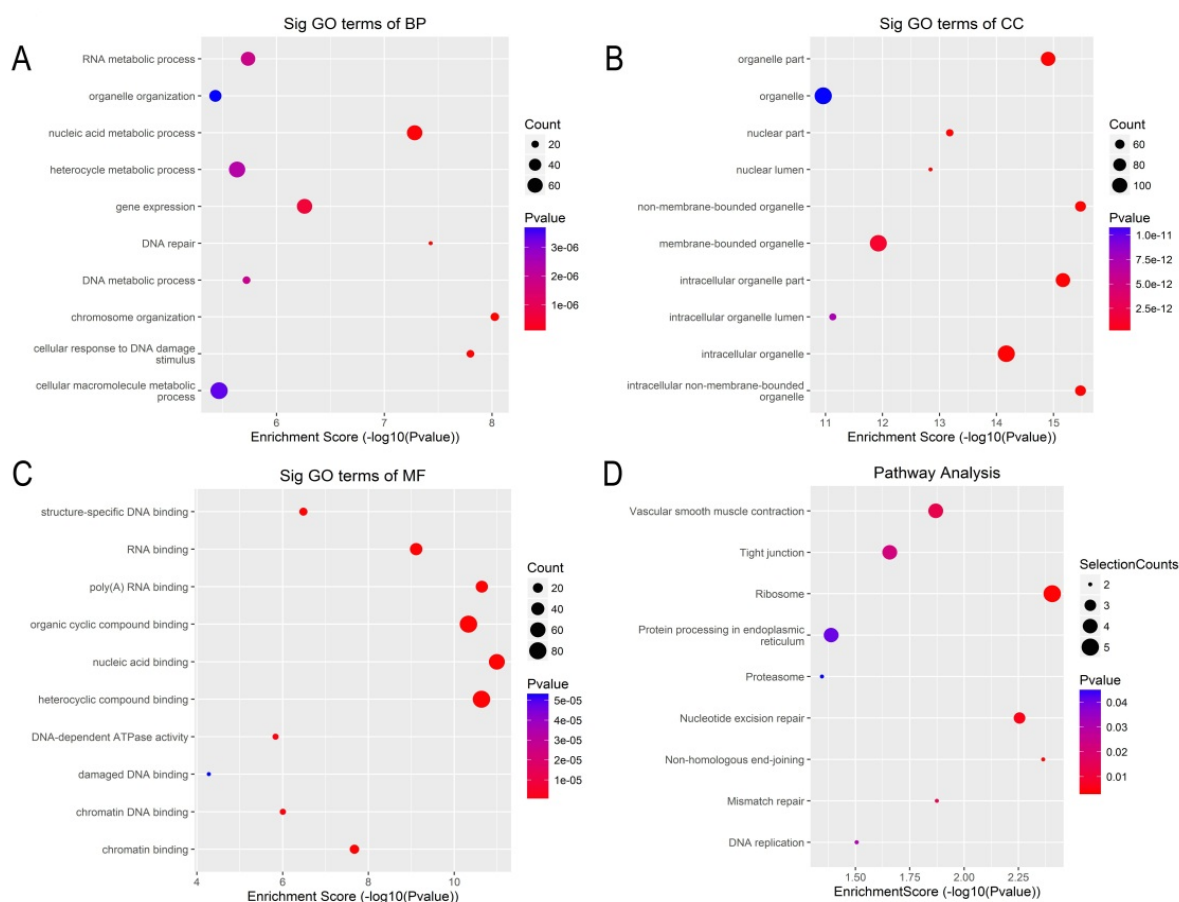

**Fig. S1** Gene ontology (GO) and KEGG pathway analysis of E199L-interacting proteins. **A, B, C** The ontology covers three domains: Biological Process, Cellular Component and Molecular Function. Fisher's exact test is used to find if there is more overlap between the gene list and the GO annotation list. The  $P$ -value denotes the significance of GO terms enrichment in the genes. The lower the  $P$ -value, the more significant the GO term ( $P$ -value  $\leq 0.05$  is recommended). The dot plot shows the enrichment score values of the top ten most significant enrichment terms. **D** Pathway analysis is a functional analysis mapping gene to KEGG pathways. The Fisher  $P$ -value denotes the significance of the pathway correlated to the conditions. The smaller, the more significant (The recommend  $P$ -value cut-off is 0.05.) The dot plot shows the top ten Enrichment score ( $-\log_{10}(P\text{-value})$ ) value of the significant enrichment pathway.

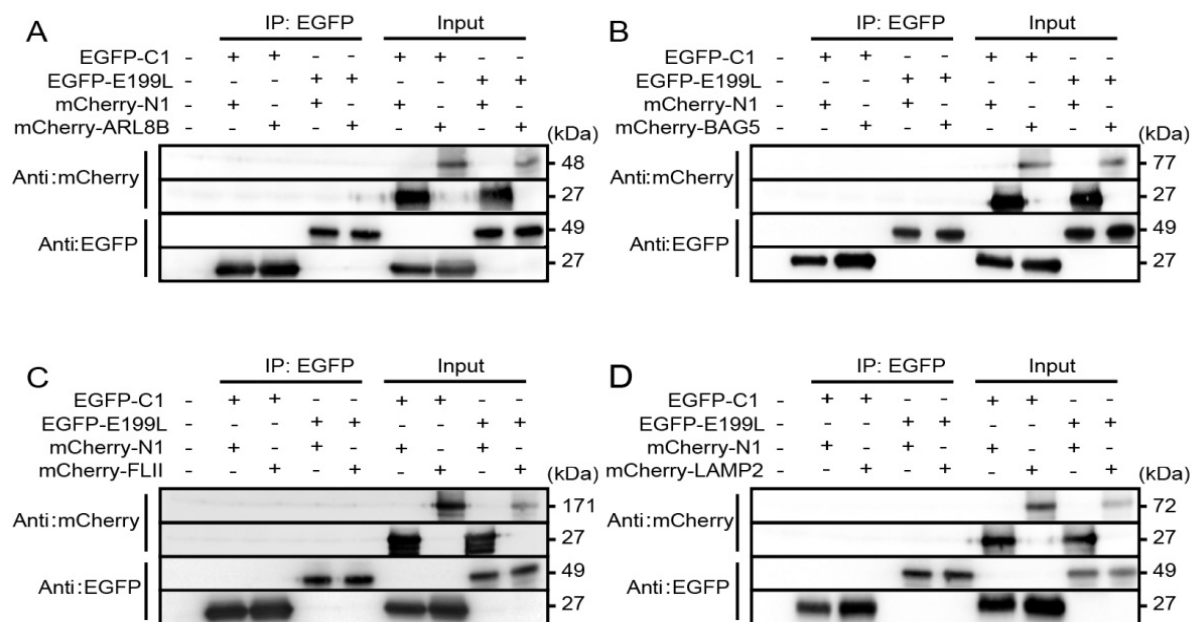

**Fig. S2** ASFV E199L protein cannot interact with 4 host proteins. Vero cells were co-transfected with EGFP-C1, EGFP-E199L, mCherry-N1 and (A) mCherry-ARL8B/ (B) mCherry-BAG5/ (C) mCherry-FLII/ (D) mCherry-LAMP2 plasmid in pairs and immunoprecipitation was performed with anti-EGFP antibody. Immunoblotting analysis was performed with anti-EGFP antibody and anti-mCherry antibody. Blots are representative of the 3 independent experiments.
